# Supplementary material for: Anaerobic Decomposition of Switchgrass by Tropical Soil-Derived Feedstock-Adapted Consortia
Source: PubMed Central journal article supplement — mBio. 2012 Feb 21;3(1):e00249-11. doi: 10.1128/mBio.00249-11 (PMC3374387; doi:10.1128/mbio.00249-11), 2012-02-21
Supplement: mbo001121229st1.pdf [file mbo001121229st1.pdf]

Table S1. TEA treatment effect in PLFA lipids.

|                                                                  | SG      |      | SG + NO <sub>3</sub> <sup>-</sup> |         | SG + Fe |      | SG + SO <sub>4</sub> <sup>-</sup> |       | P <sup>a</sup> |         |      |    |    |
|------------------------------------------------------------------|---------|------|-----------------------------------|---------|---------|------|-----------------------------------|-------|----------------|---------|------|----|----|
|                                                                  | Avg ±   | SD   | Avg ±                             | SD      | Avg ±   | SD   | Avg ±                             | SD    |                |         |      |    |    |
| <b>Fungal lipids</b>                                             |         |      |                                   |         |         |      |                                   |       |                |         |      |    |    |
| 16:1w5c                                                          | 2.59 ±  | 1.09 | 2.60 ±                            | 0.58    | 2.19 ±  | 1.51 | 1.91 ±                            | 0.69  |                |         |      |    |    |
| 18:2w6,9c                                                        | 17.2 ±  | 4.48 | 13.8 ±                            | 3.83    | 14.8 ±  | 3.73 | 15.0 ±                            | 3.57  |                |         |      |    |    |
| 18:1w9c                                                          | 184.8 ± | 24.6 | 146 ±                             | 21.1    | 127.5 ± | 14.5 | 181.6 ±                           | 47.2  |                |         |      |    |    |
| <b>Branched lipids (Gram + bacteria)</b>                         |         |      |                                   |         |         |      |                                   |       |                |         |      |    |    |
| i14:0                                                            | 1.59 ±  | 1.29 | 0.47 ±                            | 0.06    | 9.80 ±  | 10.7 | 0.70 ±                            | 0.62  |                |         |      |    |    |
| 15:010Me                                                         | 1.96 ±  | 1.03 | 1.13 ±                            | 1.22    | 2.24 ±  | 3.00 | 0.35 ±                            | 0.37  |                |         |      |    |    |
| i15:0                                                            | 3.48 ±  | 2.02 | 1.03 ±                            | 0.53    | 3.20 ±  | 3.26 | 0.82 ±                            | 0.19  |                |         |      |    |    |
| a15:0                                                            | 4.15 ±  | 3.85 | 3.41 ±                            | 0.99    | 5.36 ±  | 4.62 | 1.66 ±                            | 0.39  |                |         |      |    |    |
| i16:0                                                            | 2.48 ±  | 1.05 | 1.24 ±                            | 0.75    | 10.5 ±  | 2.61 | 1.13 ±                            | 0.42  |                |         |      |    |    |
| i17:0                                                            | 7.30 ±  | 0.93 | 5.35 ±                            | 1.60    | 4.71 ±  | 1.34 | 5.46 ±                            | 1.32  |                |         |      |    |    |
| <b>Mid-chain branched unsaturated lipids (sulfate reducers)</b>  |         |      |                                   |         |         |      |                                   |       |                |         |      |    |    |
| i17:1w9c                                                         | 26.0 ±  | 2.55 | 17.8 ±                            | 11.0    | 16.6 ±  | 14.8 | 8.67 ±                            | 5.47  |                |         |      |    |    |
| a17:1w9c                                                         | 0.68 ±  | 0.27 | 0.89 ±                            | 0.40    | 0.94 ±  | 0.38 | 0.42 ±                            | 0.10  |                |         |      |    |    |
| 10Me16:0                                                         | 2.49 ±  | 0.69 | 1.16 ±                            | 0.65    | 7.56 ±  | 2.41 | 4.14 ±                            | 4.83  |                |         |      |    |    |
| <b>Mono-unsaturated and cyclopropyl lipids (Gram – bacteria)</b> |         |      |                                   |         |         |      |                                   |       |                |         |      |    |    |
| 14:1                                                             | 1.34 ±  | 0.42 | 1.09 ±                            | 0.21    | 1.01 ±  | 0.24 | 1.67 ±                            | 0.42  |                |         |      |    |    |
| 15:1w10                                                          | 0.95 ±  | 0.38 | 0.84 ±                            | 0.21    | 0.51 ±  | 0.57 | 0.26 ±                            | 0.13  |                |         |      |    |    |
| 16:1w7c                                                          | 17.9 ±  | 3.84 | b                                 | 14.9 ±  | 4.13    | ab   | 10.1 ±                            | 2.41  | a              | 15.0 ±  | 3.64 | ab | *  |
| 17:1w9c                                                          | 1.46 ±  | 0.30 | ab                                | 0.58 ±  | 0.19    | a    | 1.44 ±                            | 1.08  | b              | 0.87 ±  | 0.21 | ab | *  |
| 18:1w7c                                                          | 4.17 ±  | 1.86 |                                   | 3.51 ±  | 0.92    |      | 1.65 ±                            | 0.47  |                | 8.08 ±  | 1.60 |    |    |
| 19:1                                                             | 16.7 ±  | 2.65 | a                                 | 14.6 ±  | 7.14    | a    | 5.20 ±                            | 3.13  | b              | 3.62 ±  | 2.34 | ab | *  |
| cy19:0                                                           | 1.10 ±  | 0.42 |                                   | 1.17 ±  | 0.25    |      | 1.26 ±                            | 0.60  |                | 1.88 ±  | 1.66 |    |    |
| <b>Saturated lipids (general biomass)</b>                        |         |      |                                   |         |         |      |                                   |       |                |         |      |    |    |
| 14:0                                                             | 19.9 ±  | 4.22 |                                   | 14.9 ±  | 3.80    |      | 18.0 ±                            | 7.21  |                | 19.5 ±  | 3.08 |    |    |
| 15:0                                                             | 3.17 ±  | 1.11 |                                   | 1.61 ±  | 0.56    |      | 1.98 ±                            | 0.87  |                | 1.71 ±  | 0.17 |    |    |
| 16:0                                                             | 71.7 ±  | 12.2 |                                   | 57.8 ±  | 17.8    |      | 66.8 ±                            | 26.9  |                | 57.4 ±  | 5.11 |    |    |
| 17:0                                                             | 3.76 ±  | 1.17 |                                   | 2.45 ±  | 0.74    |      | 2.52 ±                            | 2.12  |                | 1.92 ±  | 0.65 |    |    |
| 18:0                                                             | 35.2 ±  | 4.70 | c                                 | 32.7 ±  | 5.50    | bc   | 20.6 ±                            | 6.66  | ab             | 20.0 ±  | 3.70 | a  | ** |
| <b>Trans lipids (stress biomarkers)</b>                          |         |      |                                   |         |         |      |                                   |       |                |         |      |    |    |
| 16:1w7t                                                          | 1.51 ±  | 0.39 | b                                 | 1.21 ±  | 0.39    | ab   | 0.68 ±                            | 0.30  | a              | 0.67 ±  | 0.06 | a  | ** |
| 18:2w6,8t                                                        | 19.3 ±  | 3.23 |                                   | 11.8 ±  | 3.10    |      | 15.4 ±                            | 3.24  |                | 15.6 ±  | 3.34 |    |    |
| 18:1w9t                                                          | 48.1 ±  | 6.04 |                                   | 46.2 ±  | 16.3    |      | 37.1 ±                            | 10.0  |                | 40.9 ±  | 10.3 |    |    |
| <b>Total abundance</b>                                           |         |      |                                   |         |         |      |                                   |       |                |         |      |    |    |
|                                                                  | 504.3 ± | 60.5 |                                   | 400.2 ± | 76.8    |      | 390.1 ±                           | 124.5 |                | 411.1 ± | 41.7 |    |    |

<sup>a</sup>For P-values from ANOVA, \* <0.05; \*\* <0.01; \*\*\* <0.001
