# Supplementary material for: Anaerobic Decomposition of Switchgrass by Tropical Soil-Derived Feedstock-Adapted Consortia
Source: PubMed Central journal article supplement — mBio. 2012 Feb 21;3(1):e00249-11. doi: 10.1128/mBio.00249-11 (PMC3374387; doi:10.1128/mbio.00249-11), 2012-02-21
Supplement: mbo001121229st2.pdf [file mbo001121229st2.pdf]

Table S2. Abundance of taxa by phylum in Rain Forest (RF) FACs, mean +/- standard deviation

| RF-FACs             |                      |             |                                   |             |                                   |
|---------------------|----------------------|-------------|-----------------------------------|-------------|-----------------------------------|
| Domain <sup>a</sup> | Phylum               | SG          | SG + NO <sub>3</sub> <sup>-</sup> | SG + Fe     | SG + SO <sub>4</sub> <sup>-</sup> |
| B                   | Firmicutes           | 8880 ± 2848 | 5560 ± 6662                       | 5183 ± 5053 | 5812 ± 2073                       |
| B                   | Proteobacteria       | 5065 ± 1366 | 267 ± 40                          | 3455 ± 619  | 1533 ± 189                        |
| B                   | Bacteroidetes        | 2426 ± 1142 | 2 ± 2                             | 6035 ± 3149 | 1124 ± 204                        |
| A                   | Methanobacteria_Eury | 122 ± 42    | 0                                 | 82 ± 15     | 0                                 |
| B                   | Acidobacteria        | 62 ± 15     | 5 ± 4                             | 185 ± 51    | 12 ± 4                            |
| A                   | Methanomicrobia_Eury | 52 ± 16     | 0                                 | 116 ± 35    | 5 ± 4                             |
| B                   | Actinobacteria       | 3 ± 1       | 357 ± 384                         | 771 ± 144   | 0                                 |
| B                   | Spirochaetes         | 24 ± 9      | 0                                 | 144 ± 56    | 5 ± 4                             |
| B                   | Chlorobi             | 0           | 0                                 | 1 ± 0       | 0                                 |
| B                   | Chloroflexi          | 2 ± 1       | 0                                 | 28 ± 7      | 0                                 |
| B                   | Unknown              | 0           | 0                                 | 1 ± 0       | 3 ± 1                             |
| B                   | Cyanobacteria        | 0           | 1 ± 0                             | 0           | 0                                 |
| B                   | Planctomycetes       | 2 ± 1       | 0                                 | 0           | 0                                 |
| E                   | Viridiplantae        | 0           | 0                                 | 2 +/- 0     | 0                                 |
| E                   | Metazoa              | 1 +/- 0     | 0                                 | 1 +/- 0     | 0                                 |
| A                   | C2                   | 3 +/- 0     | 0                                 | 0           | 0                                 |
| A                   | Thermoprotei_Cren    | 1 +/- 0     | 0                                 | 3 +/- 0     | 0                                 |
| E                   | Alveolata            | 0           | 1 +/- 0                           | 0           | 1 +/- 0                           |
| A                   | Thermoplasmata_Eury  | 2 +/- 0     | 0                                 | 0           | 0                                 |
| E                   | Fungi                | 1 +/- 0     | 0                                 | 0           | 0                                 |
| B                   | GAL35                | 1 +/- 0     | 0                                 | 0           | 0                                 |
| B                   | Gemmatimonadetes     | 1 +/- 0     | 0                                 | 0           | 0                                 |
| B                   | Nitrospirae          | 0           | 1 +/- 0                           | 0           | 0                                 |
| B                   | SM2F11               | 1 +/- 0     | 0                                 | 0           | 0                                 |
| E                   | Viridiplantae        | 0           | 0                                 | 2 +/- 0     | 0                                 |
| E                   | Metazoa              | 1 +/- 0     | 0                                 | 1 +/- 0     | 0                                 |
| A                   | C2                   | 3 +/- 0     | 0                                 | 0           | 0                                 |
