# Supplementary material for: Anaerobic Decomposition of Switchgrass by Tropical Soil-Derived Feedstock-Adapted Consortia
Source: PubMed Central journal article supplement — mBio. 2012 Feb 21;3(1):e00249-11. doi: 10.1128/mBio.00249-11 (PMC3374387; doi:10.1128/mbio.00249-11), 2012-02-21
Supplement: mbo001121229st3.pdf [file mbo001121229st3.pdf]

Table S3. Abundance of taxa by phylum in Cloud Forest (CF) FACs, mean +/- standard deviation

| CF-FACs |                      | SG          | SG + NO <sub>3</sub> <sup>-</sup> | SG + Fe     | SG + SO <sub>4</sub> <sup>-</sup> |
|---------|----------------------|-------------|-----------------------------------|-------------|-----------------------------------|
| B       | Firmicutes           | 9238 ± 1015 | 12788 ± 6833                      | 7009 ± 5795 | 13547 ± 7608                      |
| B       | Proteobacteria       | 4942 ± 157  | 38 ± 29                           | 4198 ± 3959 | 5515 ± 2513                       |
| B       | Bacteroidetes        | 1578 ± 452  | 23 ± 3                            | 707 ± 600   | 209 ± 110                         |
| A       | Methanobacteria_Eury | 1512 ± 584  | 1 ± 0                             | 955 ± 874   | 1727 ± 1865                       |
| B       | Acidobacteria        | 596 ± 121   | 2 ± 1                             | 378 ± 370   | 255 ± 126                         |
| A       | Methanomicrobia_Eury | 608 ± 262   | 0                                 | 287 ± 224   | 11 ± 13                           |
| B       | Actinobacteria       | 0           | 8 ± 0                             | 5 ± 6       | 2 ± 1                             |
| E       | Stramenopiles        | 0           | 0                                 | 0           | 316 ± 455                         |
| B       | Spirochaetes         | 83 ± 18     | 0                                 | 23 ± 21     | 0                                 |
| B       | Chlorobi             | 103 ± 22    | 0                                 | 1 ± 0       | 1 ± 0                             |
| B       | Chloroflexi          | 0           | 0                                 | 0           | 4 ± 4                             |
| B       | OP10                 | 2 ± 1       | 0                                 | 0           | 0                                 |
| E       | Metazoa              | 0           | 2 +/- 0                           | 0           | 0                                 |
| B       | Elusimicrobia_TG1    | 0           | 0                                 | 0           | 3 +/- 0                           |
| B       | VHS-B5-50            | 0           | 0                                 | 0           | 1 +/- 0                           |
