# Supplementary material for: Anaerobic Decomposition of Switchgrass by Tropical Soil-Derived Feedstock-Adapted Consortia
Source: PubMed Central journal article supplement — mBio. 2012 Feb 21;3(1):e00249-11. doi: 10.1128/mBio.00249-11 (PMC3374387; doi:10.1128/mbio.00249-11), 2012-02-21
Supplement: mbo001121229st4.pdf [file mbo001121229st4.pdf]

Table S4. Dominant taxa by Site

| Phylum          | Class               | Order                                         | Subgroup                                 | RF               | CF               | P  |
|-----------------|---------------------|-----------------------------------------------|------------------------------------------|------------------|------------------|----|
| Archaea         |                     |                                               |                                          |                  |                  |    |
| Methanobacteria | Methanobrevibacter  | Methanobacterium_subterraneum                 |                                          | 0.3 +/- 0.5      | 5.4 +/- 3.8      | ** |
| Methanomicrobia | Methanosarcinales   | Methanosarcinaceae                            | Methanosarcina                           | 0.2 +/- 0.3      | 1.3 +/- 1.6      | *  |
| Bacteria        |                     |                                               |                                          |                  |                  |    |
| Acidobacteria   | Acidobacteriales    | UA1                                           |                                          | 0.3 +/- 0.3      | 1.4 +/- 1.2      | *  |
| Actinobacteria  | Actinobacteridae    | Actinomycetales                               | Propionibacterineae;<br>Nocardioideaceae | 1.4 +/- 2        | 0                | *  |
| Bacteroidetes   | Bacteroidales       | BCf7-02                                       |                                          | 10.5 +/- 9.6     | 3.1 +/- 3.5      | *  |
| Bacteroidetes   | Bacteroidales       | Bacteroidetes_bacterium_PPf50E2; E1-K9; BA017 |                                          | 0.9 +/- 1.8      | 0                |    |
| Bacteroidetes   | Bacteroidales       | Dysgonomonaceae                               |                                          | 0.4 +/- 1        | 0                |    |
| Bacteroidetes   | Bacteroidales       | Proteophilaceae                               |                                          | 4.5 +/- 15.1     | 0                |    |
| Firmicutes      | Bacillales          | Bacillaceae                                   | Bacillus                                 | 1.1 +/- 3        | 0                |    |
| Firmicutes      | Bacillales          | Paenibacillaceae                              | Paenibacillus                            | 0.3 +/- 0.6      | 0.1 +/- 0.1      |    |
| Firmicutes      | Clostridia          | Clostridiales                                 | Clostridiaceae                           | 1.6 +/- 2.7      | 17.8 +/-<br>36.5 | *  |
| Firmicutes      | Clostridia          | Clostridiales                                 | Clostridiaceae                           | 11.4 +/-<br>29.9 | 14.3 +/-<br>15.8 |    |
| Firmicutes      | Clostridia          | Clostridiales                                 | Clostridiaceae                           | 2.2 +/- 3.3      | 0.1 +/- 0.2      |    |
| Firmicutes      | Clostridia          | Clostridiales                                 | Clostridiaceae; Clostridium              | 2.2 +/- 6.7      | 3.8 +/- 5        |    |
| Firmicutes      | Clostridia          | Clostridiales                                 | Clostridiaceae; Clostridium              | 15.8 +/-<br>21.3 | 8.5 +/-<br>28.8  |    |
| Firmicutes      | Clostridia          | Clostridiales                                 | Clostridiaceae; Clostridium              | 3.8 +/- 5        | 0 +/- 0.1        | *  |
| Firmicutes      | Clostridia          | Clostridiales                                 | Clostridiaceae; Clostridium              | 8.1 +/- 15.2     | 2.3 +/- 2.2      |    |
| Firmicutes      | Clostridia          | Clostridiales                                 | Clostridiaceae; Clostridium              | 2 +/- 2.2        | 0 +/- 0.1        | *  |
| Firmicutes      | Clostridia          | Clostridiales                                 | Clostridiaceae; Clostridium              | 0.5 +/- 0.4      | 0.6 +/- 0.7      |    |
| Firmicutes      | Clostridia          | Clostridiales                                 | Clostridiaceae; Clostridium              | 2.5 +/- 3.6      | 0                | *  |
| Firmicutes      | Clostridia          | Clostridiales                                 | Clostridiaceae; Clostridium              | 0.6 +/- 1.2      | 0                |    |
| Firmicutes      | Clostridia          | Clostridiales                                 | Clostridiaceae; Clostridium              | 0.9 +/- 1        | 0                | *  |
| Firmicutes      | Clostridia          | Clostridiales                                 | Clostridiaceae; Clostridium              | 2.2 +/- 3.6      | 0                |    |
| Firmicutes      | Clostridia          | Clostridiales                                 | Clostridium_aminovaleericum              | 2.7 +/- 5.8      | 0                |    |
| Firmicutes      | Clostridia          | Clostridiales                                 | Faecalibacterium                         | 0.1 +/- 0.1      | 0.7 +/- 1        | *  |
| Firmicutes      | Clostridia          | Clostridiales                                 | Ruminococcus                             | 0.3 +/- 1        | 12.5 +/-<br>12.8 | *  |
| Firmicutes      | Clostridia          | Clostridiales                                 | Ruminococcus;<br>Ruminococcus_bromii     | 0.9 +/- 1.3      | 0                | ** |
| Firmicutes      | Clostridia          | Clostridiales                                 | UC7-69                                   | 0.3 +/- 0.8      | 0                | *  |
| Firmicutes      | Clostridia          | Clostridiales                                 |                                          | 0.4 +/- 0.8      | 2 +/- 3.5        |    |
| Proteobacteria  | Alphaproteobacteria | Ellin329                                      |                                          | 12.5 +/-<br>11.8 | 20.2 +/-<br>12.4 |    |
| Proteobacteria  | Alphaproteobacteria | Rhizobiales                                   |                                          | 1 +/- 1.9        | 0                |    |
| Proteobacteria  | Deltaproteobacteria | Desulfovibrionales                            | Desulfovibrionaceae;<br>Desulfovibrio    | 0.8 +/- 1.2      | 0.3 +/- 0.4      |    |
| Proteobacteria  | Gammaproteobacteria | Enterobacteriales                             | Enterobacteriaceae;<br>Enterobacter      | 0.8 +/- 1.6      | 0                |    |
| Eukaryota       |                     |                                               |                                          |                  |                  |    |
| stramenopiles   | Oomycetes           | Peronosporales                                | Phytophthora                             |                  | 0 0.3 +/- 0.7    |    |

P . &lt;0.1; \* &lt;0.05; \*\* &lt;0.01
