# Supplementary material for: Anaerobic Decomposition of Switchgrass by Tropical Soil-Derived Feedstock-Adapted Consortia
Source: PubMed Central journal article supplement — mBio. 2012 Feb 21;3(1):e00249-11. doi: 10.1128/mBio.00249-11 (PMC3374387; doi:10.1128/mbio.00249-11), 2012-02-21
Supplement: mbo001121229st5.pdf [file mbo001121229st5.pdf]

Table S5. Dominant taxa in RF-FACs by TEA treatment.

| Phylum          | Class               | Order              | Subgroup                                 | SG           | SG + NO3      | SG + Fe       | SG + SO4      | P   |
|-----------------|---------------------|--------------------|------------------------------------------|--------------|---------------|---------------|---------------|-----|
| Archaea         |                     |                    |                                          |              |               |               |               |     |
| Methanobacteria | Methanobrevibacter  | Methanobacterium   | subterraneum                             | 0.8 +/- 0.6  | 0             | 0.3 +/- 0.3   | 0             | .   |
| Methanomicrobia | Methanosarcinales   | Methanosarcinaceae | Methanosarcina                           | 0.2 +/- 0.1  | 0             | 0.4 +/- 0.5   | 0.1 +/- 0     |     |
| Bacteria        |                     |                    |                                          |              |               |               |               |     |
| Acidobacteria   | Acidobacteriales    | UA1                |                                          | 0.3 +/- 0    | 0             | 0.5 +/- 0.5   | 0.1 +/- 0.1   |     |
| Actinobacteria  | Actinobacteridae    | Actinomycetales    | Propionibacterineae;<br>Nocardioideaceae | 0            | 2.1 +/- 2.2   | 2.8 +/- 2.5   | 0             |     |
| Bacteroidetes   | Bacteroidales       | BCf7-02            |                                          | 13.2 +/- 4   | 0             | 16.4 +/- 14.3 | 13.3 +/- 1.5  |     |
| Bacteroidetes   | Bacteroidales       | Bacteroidetes      | bacterium_PPf50E2; E1-K9; BA017          | 0.6 +/- 0.9  | 0             | 2.8 +/- 2.8   | 0             |     |
| Bacteroidetes   | Bacteroidales       | Dysgonomonaceae    |                                          | 0            | 0             | 1.6 +/- 1.4   | 0             | .   |
| Bacteroidetes   | Bacteroidales       | Proteophilaceae    |                                          | 0            | 16.7 +/- 28.9 | 0             | 0             |     |
| Firmicutes      | Bacillales          | Bacillaceae        | Bacillus                                 | 0            | 4.2 +/- 5     | 0             | 0             |     |
| Firmicutes      | Bacillales          | Paenibacillaceae   | Paenibacillus                            | 0            | 0.2 +/- 0.2   | 0.9 +/- 1     | 0             |     |
| Firmicutes      | Clostridia          | Clostridiales      |                                          | 1.5 +/- 0.9  | 0             | 0             | 0 +/- 0       | *   |
| Firmicutes      | Clostridia          | Clostridiales      | Clostr; Clostridium                      | 0            | 0             | 0             | 11.8 +/- 14.6 |     |
| Firmicutes      | Clostridia          | Clostridiales      | Clostr; Clostridium                      | 6 +/- 2.7    | 37.2 +/- 32.9 | 1.6 +/- 1.5   | 19.7 +/- 7.8  |     |
| Firmicutes      | Clostridia          | Clostridiales      | Clostr; Clostridium                      | 7.3 +/- 4    | 0             | 0             | 9.7 +/- 4.9   | **  |
| Firmicutes      | Clostridia          | Clostridiales      | Clostr; Clostridium                      | 1.6 +/- 0.4  | 27.2 +/- 20   | 0.3 +/- 0.3   | 0.8 +/- 0.8   | *   |
| Firmicutes      | Clostridia          | Clostridiales      | Clostr; Clostridium                      | 3.5 +/- 0.2  | 0             | 0.1 +/- 0.1   | 5.2 +/- 0.6   | *** |
| Firmicutes      | Clostridia          | Clostridiales      | Clostr; Clostridium                      | 0.9 +/- 0.3  | 0             | 0.5 +/- 0.5   | 0.6 +/- 0.1   | *   |
| Firmicutes      | Clostridia          | Clostridiales      | Clostr; Clostridium                      | 6.6 +/- 3.3  | 0             | 0             | 3.6 +/- 4     | *   |
| Firmicutes      | Clostridia          | Clostridiales      | Clostr; Clostridium                      | 0            | 0             | 2.1 +/- 1.8   | 0.3 +/- 0.1   | .   |
| Firmicutes      | Clostridia          | Clostridiales      | Clostr; Clostridium                      | 1.6 +/- 1.3  | 0.6 +/- 0.8   | 0             | 1.4 +/- 0.2   |     |
| Firmicutes      | Clostridia          | Clostridiales      | Clostr; Clostridium                      | 7.4 +/- 2.7  | 0             | 0             | 0.9 +/- 1.1   | *** |
| Firmicutes      | Clostridia          | Clostridiales      | Clostridiaceae                           | 5.5 +/- 2.4  | 0             | 0             | 0.7 +/- 0.2   | **  |
| Firmicutes      | Clostridia          | Clostridiales      | Clostridiaceae                           | 0            | 0             | 41.7 +/- 50.7 | 0             |     |
| Firmicutes      | Clostridia          | Clostridiales      | Clostridiaceae                           | 1.4 +/- 0.7  | 4.9 +/- 5.7   | 0             | 2.4 +/- 0.8   |     |
| Firmicutes      | Clostridia          | Clostridiales      | Clostridium aminovalericum               | 0            | 0.1 +/- 0.1   | 9.6 +/- 8.3   | 0             | .   |
| Firmicutes      | Clostridia          | Clostridiales      | Faecalibacterium                         | 0.1 +/- 0    | 0             | 0.1 +/- 0     | 0.1 +/- 0     | **  |
| Firmicutes      | Clostridia          | Clostridiales      | Ruminococcus                             | 0            | 0             | 0             | 1.6 +/- 2.3   |     |
| Firmicutes      | Clostridia          | Clostridiales      | Ruminococcus;<br>Ruminococcus_bromii     | 2.7 +/- 1.3  | 0.3 +/- 0.5   | 0             | 0.5 +/- 0.2   | *   |
| Firmicutes      | Clostridia          | Clostridiales      | UC7-69                                   | 0            | 0             | 0             | 1.8 +/- 0.8   | **  |
| Proteobacteria  | Alphaproteobacteria | Ellin329           |                                          | 28.6 +/- 3.7 | 1.2 +/- 1     | 5.9 +/- 5.2   | 15.1 +/- 3.1  | *** |
| Proteobacteria  | Alphaproteobacteria | Rhizobiales        |                                          | 0.6 +/- 0.6  | 0             | 3.2 +/- 2.7   | 0             |     |
| Proteobacteria  | Deltaproteobacteria | Desulfovibrionales | Desulfovibrionaceae;<br>Desulfovibrio    | 0.2 +/- 0.2  | 0             | 0.9 +/- 0.8   | 3 +/- 0.1     | *** |
| Proteobacteria  | Gammaproteobacteria | Enterobacteriales  | Enterobacteriaceae;<br>Enterobacter      | 0            | 1.4 +/- 2.5   | 1.5 +/- 1.9   | 0             |     |
| Eukaryota       |                     |                    |                                          |              |               |               |               |     |
| stramenopiles   | Oomycetes           | Peronosporales     | Phytophthora                             | 0            | 0             | 0             | 0             |     |

P. &lt;0.1; \* &lt;0.05; \*\* &lt;0.01; \*\*\* &lt;0.001
