# Supplementary material for: Anaerobic Decomposition of Switchgrass by Tropical Soil-Derived Feedstock-Adapted Consortia
Source: PubMed Central journal article supplement — mBio. 2012 Feb 21;3(1):e00249-11. doi: 10.1128/mBio.00249-11 (PMC3374387; doi:10.1128/mbio.00249-11), 2012-02-21
Supplement: mbo001121229st6.pdf [file mbo001121229st6.pdf]

Table S6. Dominant taxa in CF-FACs by TEA treatment.

| Phylum          | Class               | Order                                         | Subgroup                              | SG           | SG + NO3      | SG + Fe      | SG + SO4     | P   |
|-----------------|---------------------|-----------------------------------------------|---------------------------------------|--------------|---------------|--------------|--------------|-----|
| Archaea         |                     |                                               |                                       |              |               |              |              |     |
| Methanobacteria | Methanobrevibacter  | Methanobacterium_subterraneum                 |                                       | 7.7 +/- 2.3  | 0             | 7 +/- 0.9    | 6.8 +/- 3.8  | **  |
| Methanomicrobia | Methanosarcinales   | Methanosarcinaceae                            | Methanosarcina                        | 3.1 +/- 1.1  | 0             | 2.2 +/- 1.1  | 0            | *** |
| Bacteria        |                     |                                               |                                       |              |               |              |              |     |
| Acidobacteria   | Acidobacteriales    | UA1                                           |                                       | 2.4 +/- 0.7  | 0             | 2.6 +/- 0.5  | 0.5 +/- 0    | *** |
| Actinobacteria  | Actinobacteridae    | Actinomycetales                               | Nocardioideaceae;<br>Propioniceimonas | 0            | 0             | 0            | 0            |     |
| Bacteroidetes   | Bacteroidales       | BCf7-02                                       |                                       | 7.7 +/- 1.9  | 0.1 +/- 0.1   | 4.6 +/- 1.4  | 0            | *** |
| Bacteroidetes   | Bacteroidales       | Bacteroidetes_bacterium_PPf50E2; E1-K9; BA017 |                                       | 0            | 0             | 0            | 0            |     |
| Bacteroidetes   | Bacteroidales       | Dysgonomonaceae                               |                                       | 0            | 0             | 0            | 0            |     |
| Bacteroidetes   | Bacteroidales       | Proteophilaceae                               |                                       | 0            | 0             | 0            | 0            |     |
| Firmicutes      | Bacillales          | Bacillaceae                                   | Bacillus                              | 0            | 0             | 0            | 0            |     |
| Firmicutes      | Bacillales          | Paenibacillaceae                              | Paenibacillus                         | 0.1 +/- 0.1  | 0             | 0.1 +/- 0.1  | 0            |     |
| Firmicutes      | Clostridia          | Clostridiales                                 |                                       | 0            | 0             | 0.1 +/- 0    | 7.7 +/- 0.7  | *** |
| Firmicutes      | Clostridia          | Clostridiales                                 | Clostr; Clostridium                   | 0.1 +/- 0    | 0.9 +/- 1.4   | 2.7 +/- 1.3  | 11.6 +/- 3.1 | *** |
| Firmicutes      | Clostridia          | Clostridiales                                 | Clostr; Clostridium                   | 0            | 34 +/- 57.1   | 0.1 +/- 0.1  | 0.1 +/- 0.2  |     |
| Firmicutes      | Clostridia          | Clostridiales                                 | Clostr; Clostridium                   | 0            | 0.1 +/- 0.2   | 0            | 0            |     |
| Firmicutes      | Clostridia          | Clostridiales                                 | Clostr; Clostridium                   | 0.8 +/- 0    | 0.1 +/- 0.1   | 3.7 +/- 2.1  | 4.5 +/- 1    | **  |
| Firmicutes      | Clostridia          | Clostridiales                                 | Clostr; Clostridium                   | 0            | 0.1 +/- 0.1   | 0.1 +/- 0    | 0            |     |
| Firmicutes      | Clostridia          | Clostridiales                                 | Clostr; Clostridium                   | 1.7 +/- 0.3  | 0             | 0            | 0.5 +/- 0.1  | *** |
| Firmicutes      | Clostridia          | Clostridiales                                 | Clostr; Clostridium                   | 0            | 0             | 0            | 0            |     |
| Firmicutes      | Clostridia          | Clostridiales                                 | Clostr; Clostridium                   | 0            | 0             | 0            | 0            |     |
| Firmicutes      | Clostridia          | Clostridiales                                 | Clostr; Clostridium                   | 0            | 0             | 0            | 0            |     |
| Firmicutes      | Clostridia          | Clostridiales                                 | Clostridiaceae                        | 0            | 63.9 +/- 55.3 | 4.3 +/- 1.3  | 3.1 +/- 1.7  | *   |
| Firmicutes      | Clostridia          | Clostridiales                                 | Clostridiaceae                        | 33.3 +/- 4.1 | 0             | 23.7 +/- 8.7 | 0            | *** |
| Firmicutes      | Clostridia          | Clostridiales                                 | Clostridiaceae                        | 0.4 +/- 0.1  | 0             | 0.1 +/- 0.1  | 0            | *** |
| Firmicutes      | Clostridia          | Clostridiales                                 | Clostridium aminovalericum            | 0            | 0             | 0            | 0            |     |
| Firmicutes      | Clostridia          | Clostridiales                                 | Faecalibacterium                      | 2.3 +/- 0.3  | 0             | 0.6 +/- 0.3  | 0.1 +/- 0    | *** |
| Firmicutes      | Clostridia          | Clostridiales                                 | Ruminococcus                          | 5.2 +/- 1.7  | 0.1 +/- 0.2   | 12.5 +/- 1.8 | 32 +/- 2.6   | *** |
| Firmicutes      | Clostridia          | Clostridiales                                 | Ruminococcus;<br>Ruminococcus_bromii  | 0            | 0             | 0            | 0            |     |
| Firmicutes      | Clostridia          | Clostridiales                                 | UC7-69                                | 0            | 0             | 0            | 0            |     |
| Proteobacteria  | Alphaproteobacteria | Ellin329                                      |                                       | 25.3 +/- 2.5 | 0.1 +/- 0.1   | 28.9 +/- 3.6 | 26.6 +/- 3.4 | *** |
| Proteobacteria  | Alphaproteobacteria | Rhizobiales                                   |                                       | 0            | 0             | 0            | 0            | *   |
| Proteobacteria  | Deltaproteobacteria | Desulfovibrionales                            | Desulfovibrionaceae;<br>Desulfovibrio | 0.6 +/- 0.1  | 0             | 0.7 +/- 0.5  | 0            | *   |
| Proteobacteria  | Gammaproteobacteria | Enterobacteriales                             | Enterobacteriaceae;<br>Enterobacter   | 0            | 0 +/- 0.1     | 0            | 0            |     |
| Eukaryota       |                     |                                               |                                       |              |               |              |              |     |
| stramenopiles   | Oomycetes           | Peronosporales                                | Phytophthora                          | 0            | 0             | 0            | 1 +/- 1.2    |     |

P .<0.1; \* <0.05; \*\* <0.01; \*\*\* <0.001
