# Supplementary figures and images for: Anaerobic Decomposition of Switchgrass by Tropical Soil-Derived Feedstock-Adapted Consortia
Source: PubMed Central journal article supplement — mBio. 2012 Feb 21;3(1):e00249-11. doi: 10.1128/mBio.00249-11 (PMC3374387; doi:10.1128/mbio.00249-11), 2012-02-21

Figure S1.

A.

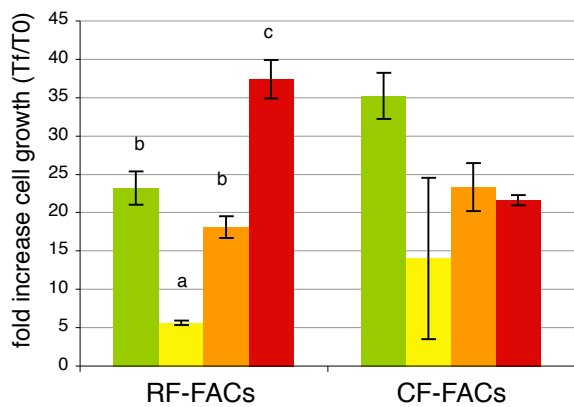

B.

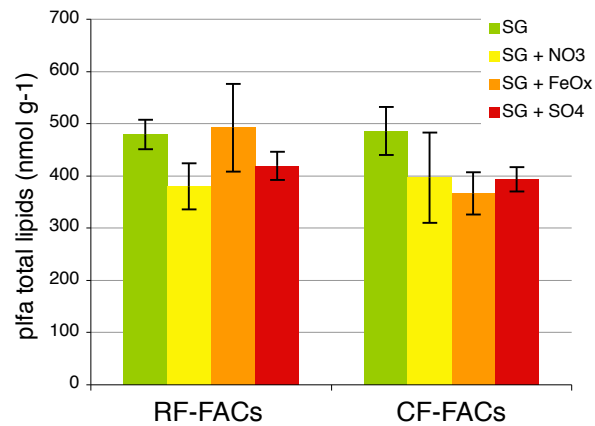

C.

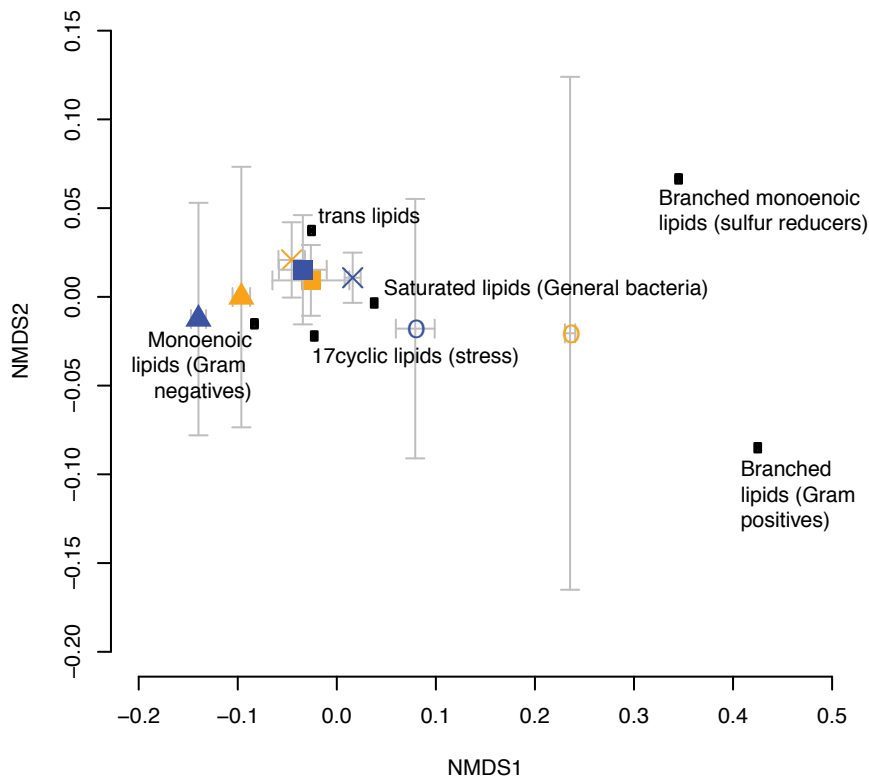

Supplement: mbo001121229sf01.pdf [file mbo001121229sf01.pdf]

Figure S2.

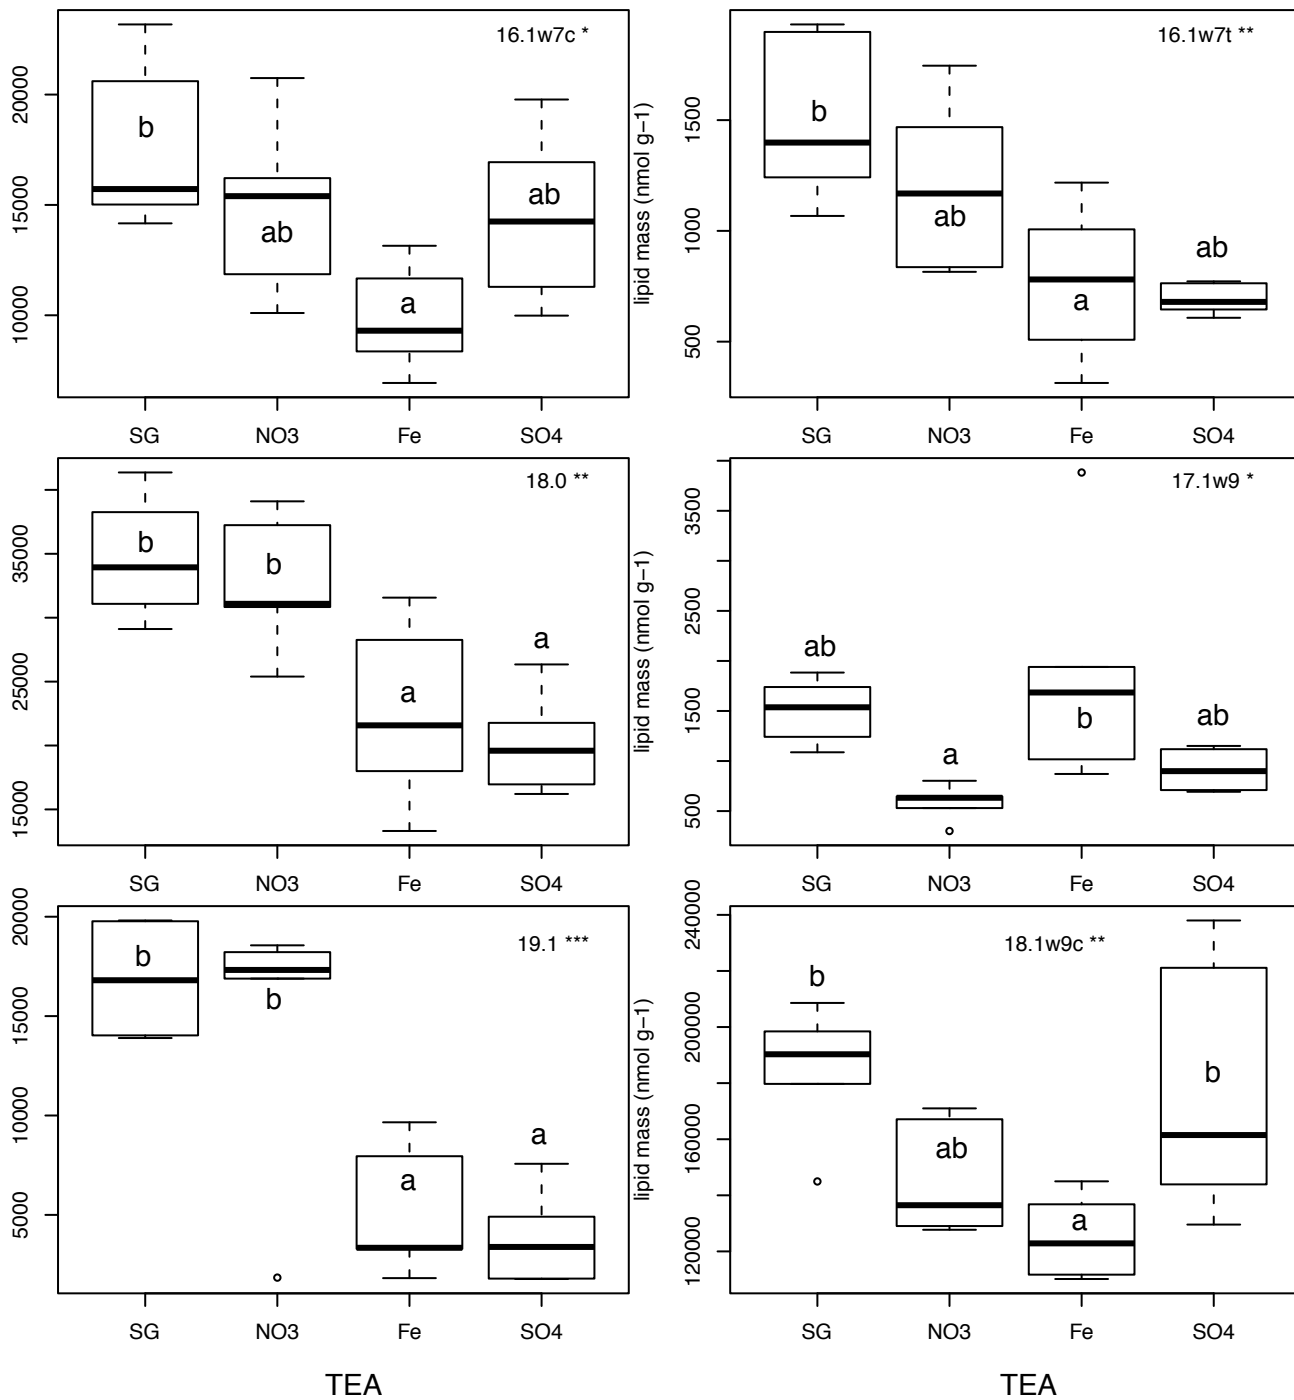

Supplement: mbo001121229sf02.pdf [file mbo001121229sf02.pdf]
